# Supplementary material for: Reproducibility in the unfolding process of protein induced by an external electric field
Source: Chem Sci. 2020 Dec 26;12(6):2030–8. doi: 10.1039/d0sc06008a (PMC8179335; doi:10.1039/d0sc06008a)
Supplement: SC-012-D0SC06008A-s001 [file SC-012-D0SC06008A-s001.pdf]

# Reproducibility in the unfolding process of protein induced by an external electric field - Supplementary Information

Anna Sinelnikova,<sup>†</sup> Thomas Mandl,<sup>†,¶</sup> Christofer Östlin,<sup>†</sup> Oscar Grånäs,<sup>†</sup> Maxim  
N. Brodmerkel,<sup>‡</sup> Erik G. Marklund,<sup>‡</sup> and Carl Coleman<sup>\*,†,§</sup>

<sup>†</sup>*Department of Physics and Astronomy, Uppsala University, Box 516, SE-751 20 Uppsala,  
Sweden*

<sup>‡</sup>*Department of Chemistry – BMC, Uppsala University, Box 576, SE-751 23 Uppsala,  
Sweden*

<sup>¶</sup>*University of Applied Sciences Technikum Wien, Höchstädtplatz 6, A-1200 Wien, Austria*

<sup>§</sup>*Center for Free-Electron Laser Science, DESY, Notkestrasse 85, DE-22607 Hamburg,  
Germany*

E-mail: carl.coleman@physics.uu.se

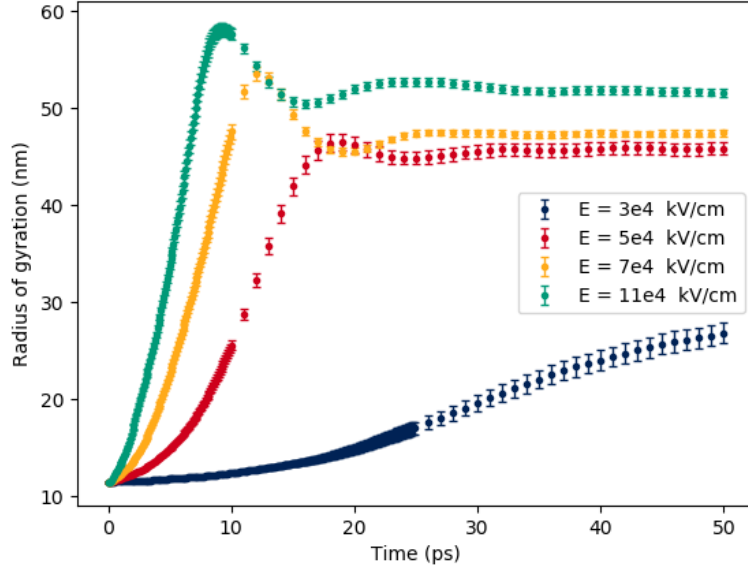

Figure S1: Average radius of gyration, and standard deviation of the average value for the simulations in the four different electric fields. Each line represents a set of 100 independent simulations, and the radius of gyration is calculated at each time step comparing the 100 structures structures at this specific time in the simulations.

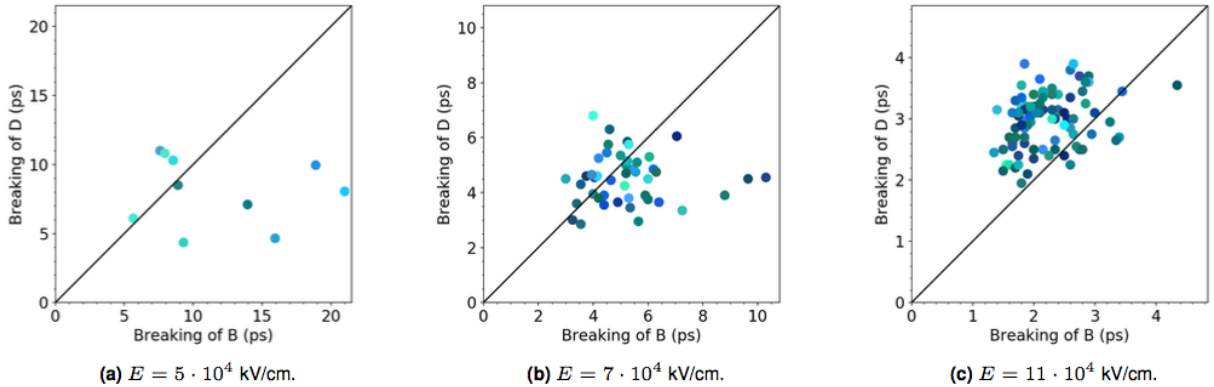

Figure S2: The time points for the breaking of B and D at three fields strengths. With increasing E-field the probability for B breaking before D increases. At higher fields B is broken before D. Each point corresponds to a single simulation.

Table 1: Dipole vs. field for folded and unfolded TRP cage, units in Debye.

| E (kV/cm)       | Folded | Unfolded |
|-----------------|--------|----------|
| No field        | 29     | 28       |
| $3 \cdot 10^4$  | 53     | 71       |
| $5 \cdot 10^4$  | 83     | 122      |
| $7 \cdot 10^4$  | 128    | 194      |
| $11 \cdot 10^4$ | 251    | 352      |

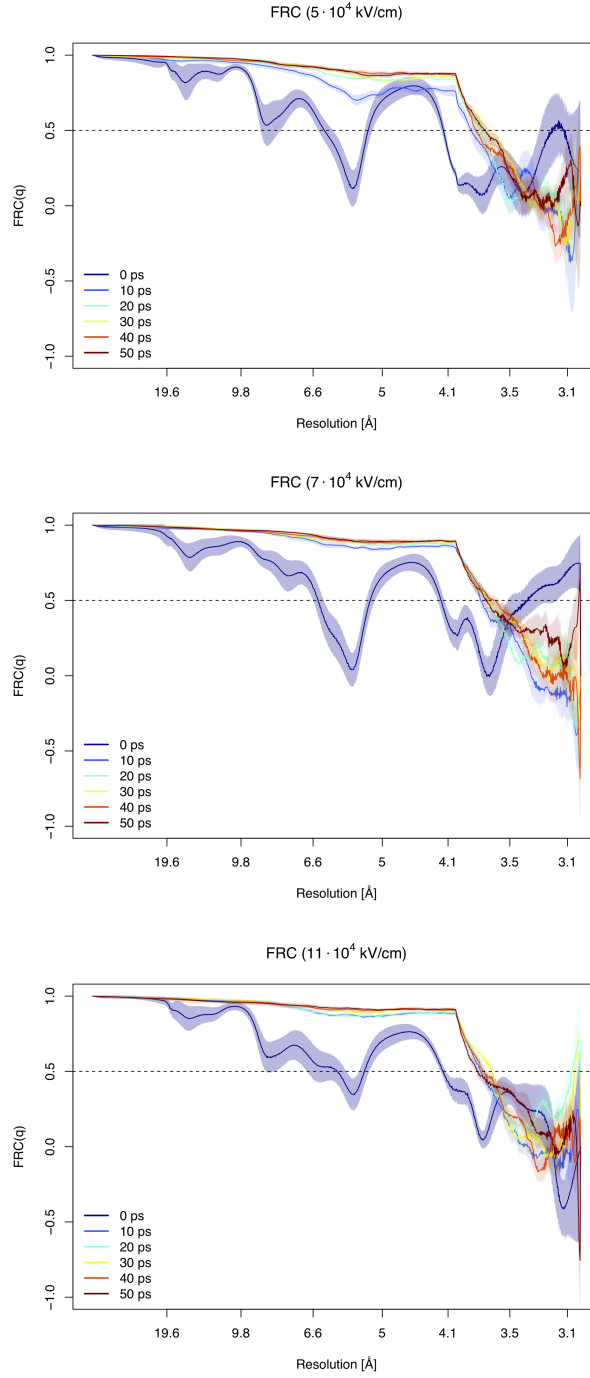

Figure S3: Estimated resolution limit, based on Fourier ring correlation (FRC) for different time points in the simulation. Field strengths above  $E = 3 \cdot 10^4$  kV/cm yield in an achievable resolution of the unfolding process around 4 Å.

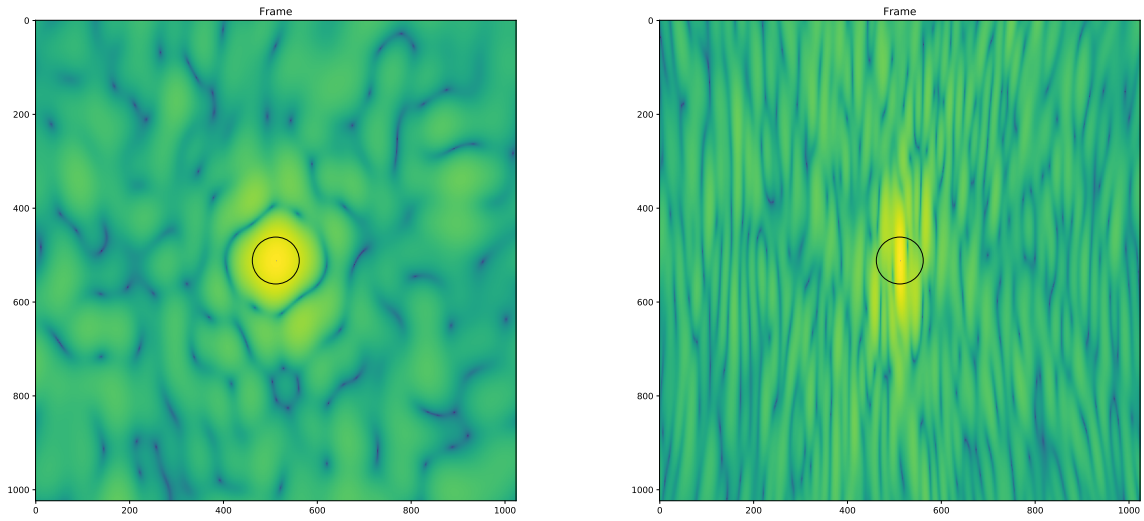

Figure S4: Simulated diffraction patterns from the molecular dynamics trajectories of the  $E = 3 \cdot 10^4$  kV/cm simulation. The diffracted image of the initial, folded structure does not have any expressed angular dependence (left panel), whereas the the diffracted image of the final, unfolded (right panel) has a strong angular dependence. The ring in the patterns shows the 15 Å resolution shell.

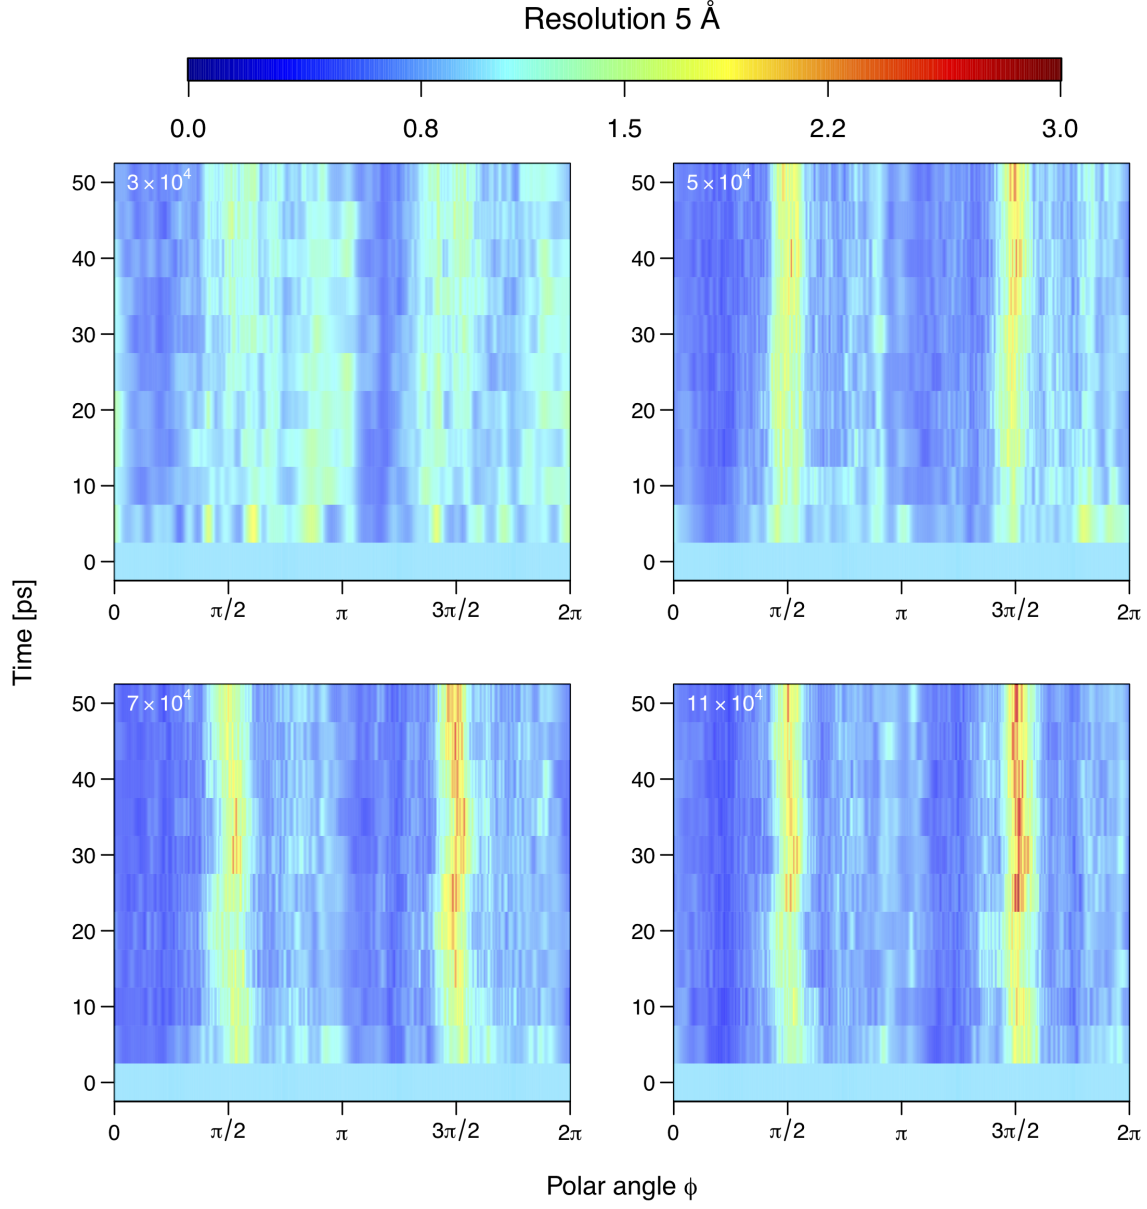

Figure S5: The relative scattered intensity as a function of angle on the detector and time, at a resolution of 5 Å for all studied electric field strengths.

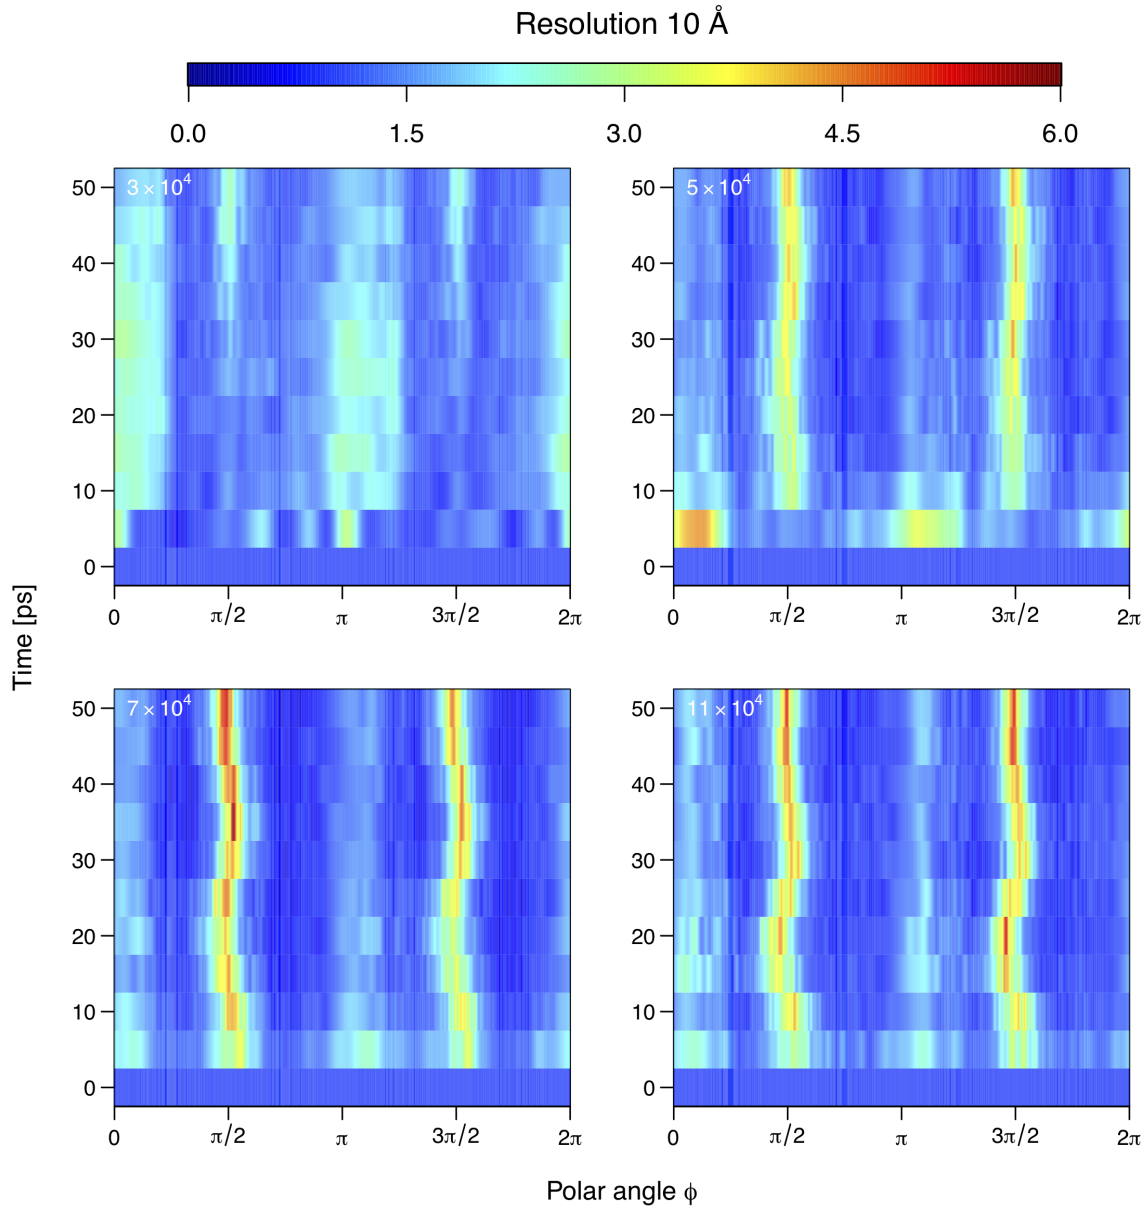

Figure S6: The relative scattered intensity as a function of angle on the detector and time, at a resolution of 10 Å for all studied electric field strengths.

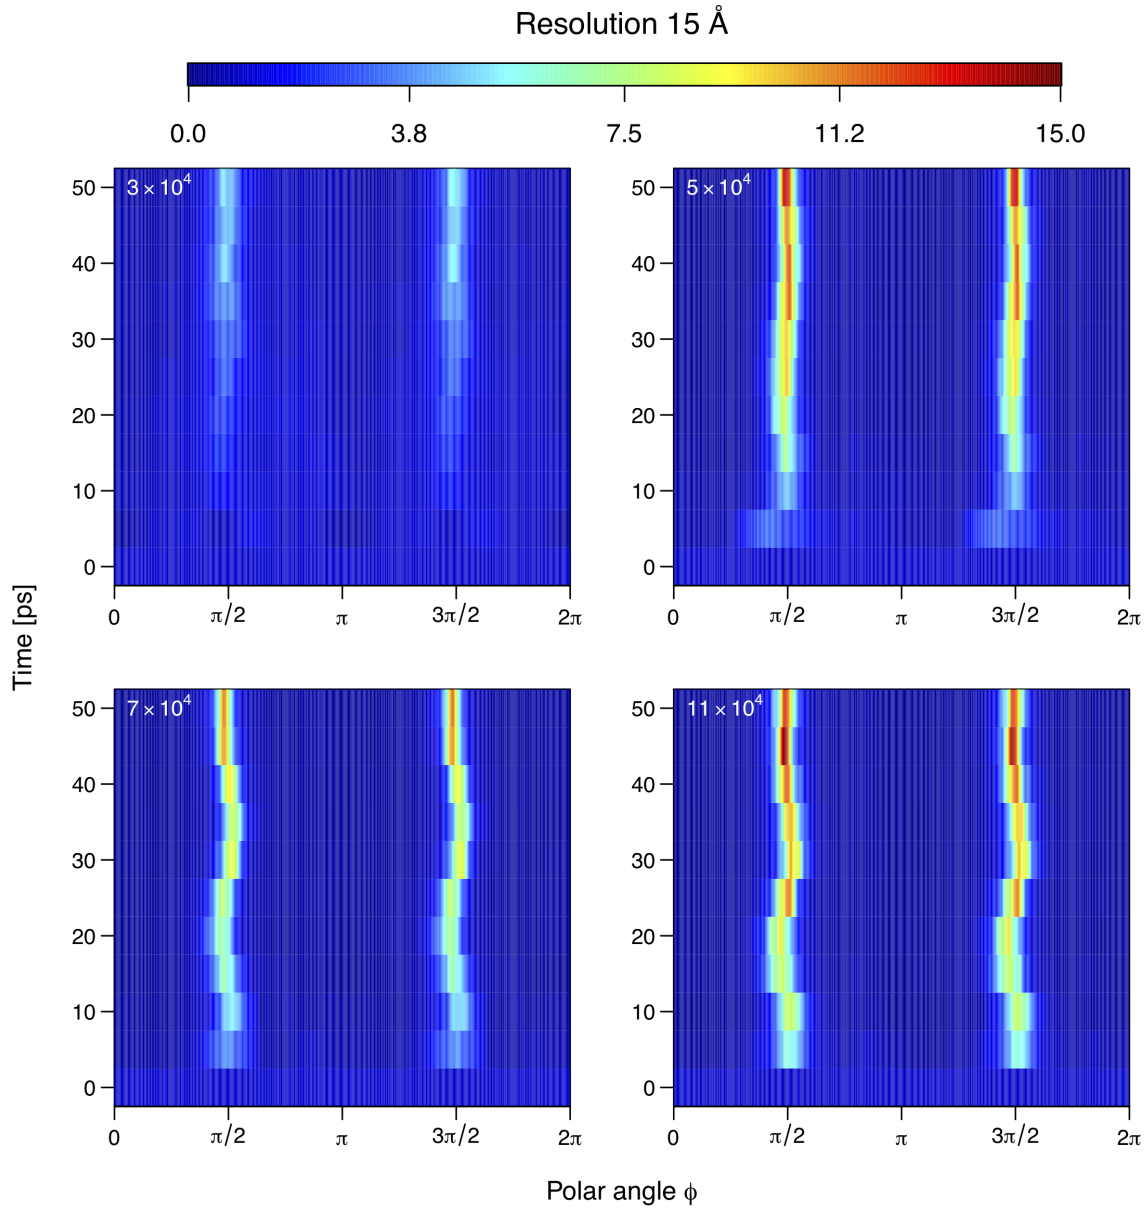

Figure S7: The relative scattered intensity as a function of angle on the detector and time, at a resolution of 15 Å for all studied electric field strengths.

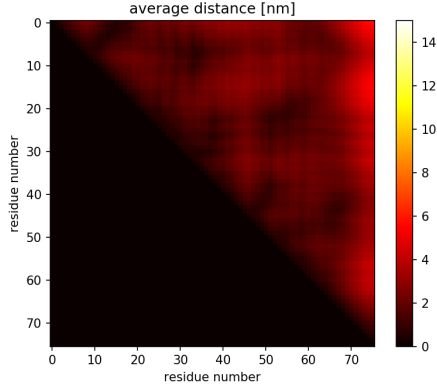

(a)  $t = 0 - 10$  ps,  $E = 5 \cdot 10^4$  kV/cm.

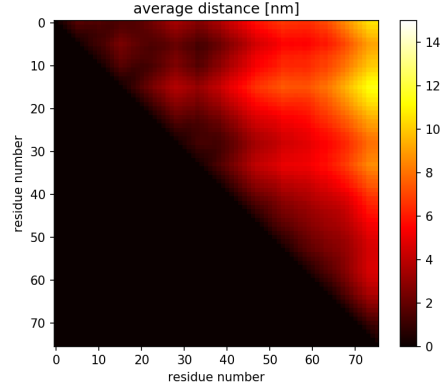

(b)  $t = 0 - 10$  ps,  $E = 11 \cdot 10^4$  kV/cm.

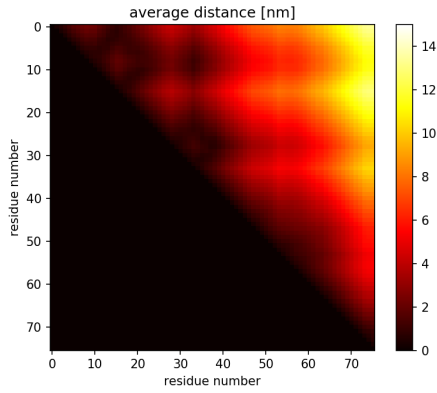

(c)  $t = 10 - 20$  ps,  $E = 5 \cdot 10^4$  kV/cm.

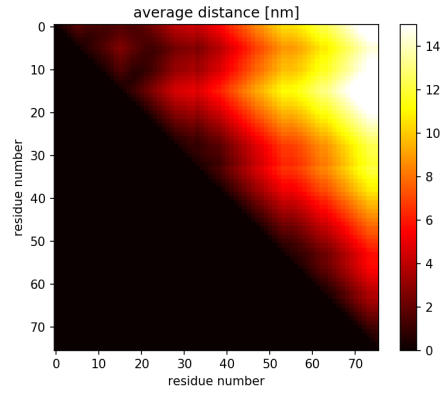

(d)  $t = 10 - 20$  ps,  $E = 11 \cdot 10^4$  kV/cm.

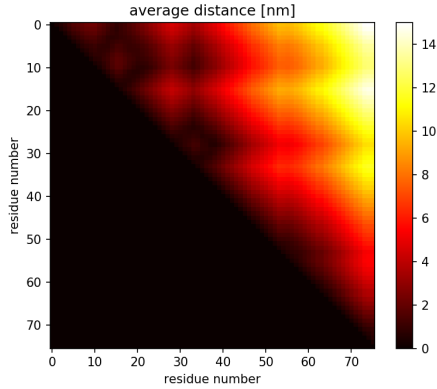

(e)  $t = 20 - 50$  ps,  $E = 5 \cdot 10^4$  kV/cm.

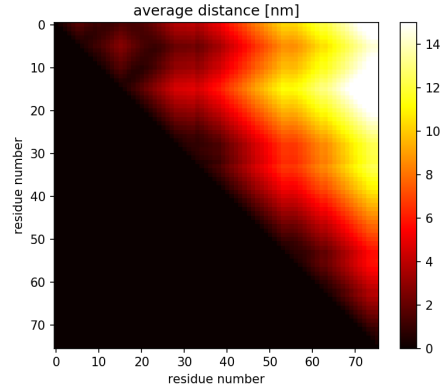

(f)  $t = 20 - 50$  ps,  $E = 11 \cdot 10^4$  kV/cm.

Figure S8: Average distance between all residues for the ubiquitin at  $E = 5 \cdot 10^4$  and  $E = 11 \cdot 10^4$  kV/cm. **a.** and **b.** Average for the first 10 ps of the simulations. **c.** and **d.** Average between 10 and 20 ps of the simulations. **e.** and **f.** The largest changes in the distances are between residues 1-7 and 65-74, 14-16 and 65-74, and 32-38 and 65-74, which should be good candidates for chromophores to detect unfolding using FRET. The color of a single pixel represents the average distance between the  $\alpha$ -carbons of a single pair of residues in the indicated time slice. Darker areas indicate lower distances, brighter colors larger distances (only upper triangular matrix shown).
